# Supplementary material for: Developing an adult stem cell derived microphysiological intestinal system for predicting oral prodrug bioconversion and permeability in humans
Source: Royal Society of Chemistry journal article supplement (doi:10.1039/d3lc00843f), 2023-12-07
Supplement: d3lc00843f1.pdf [file d3lc00843f1.pdf]

### Supplementary figures

Figure S1.

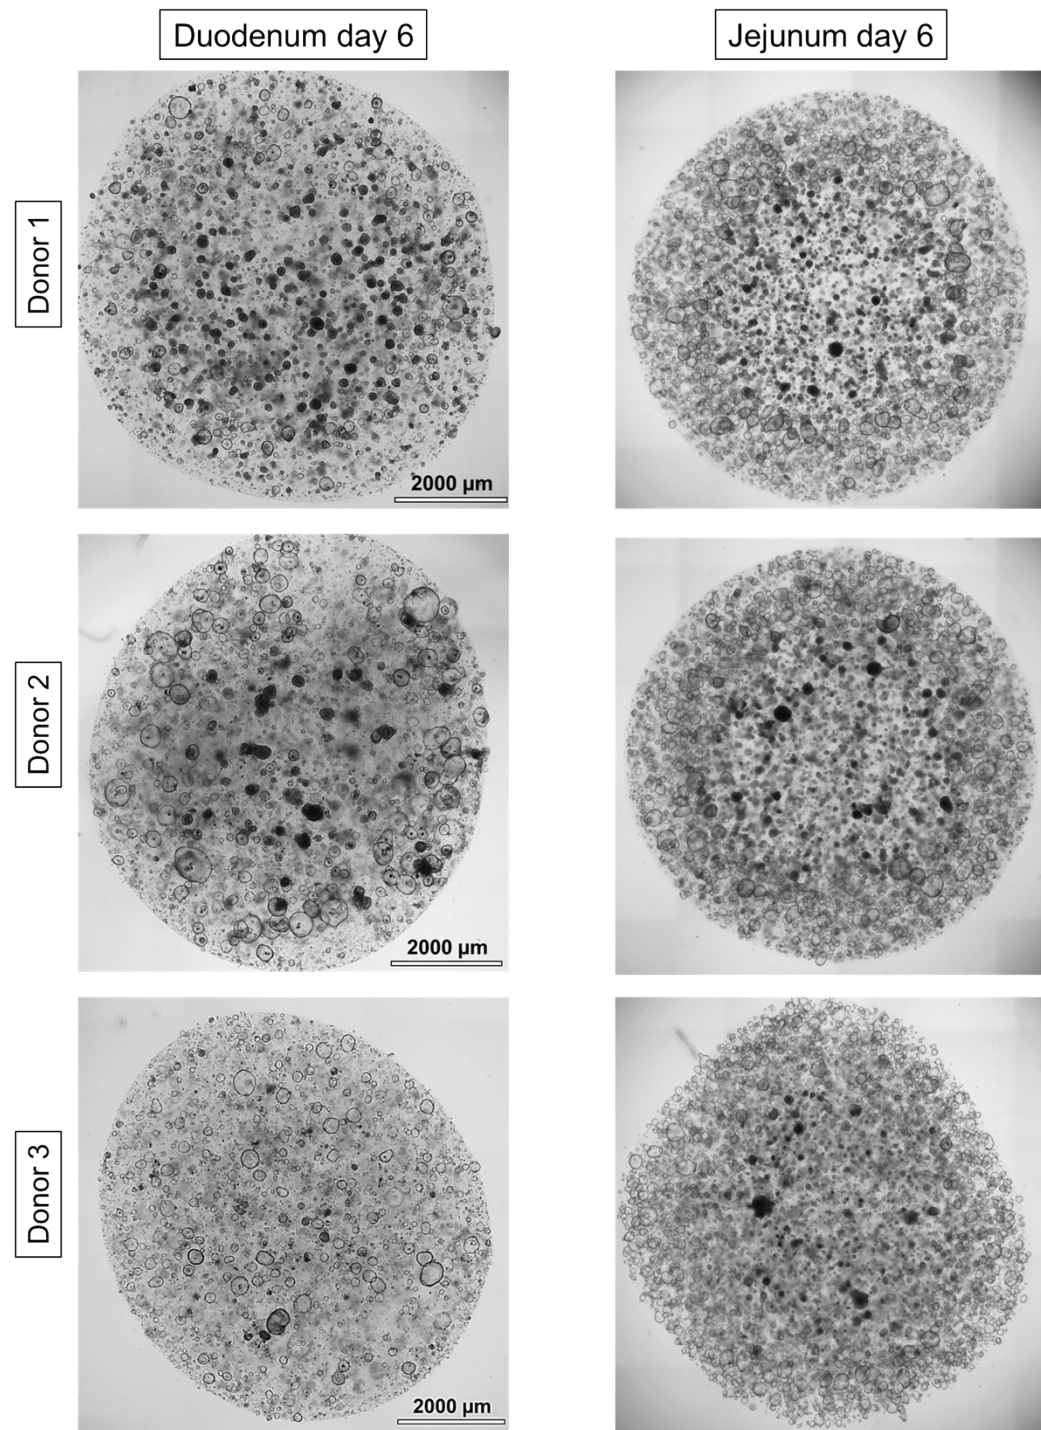

Figure S2.

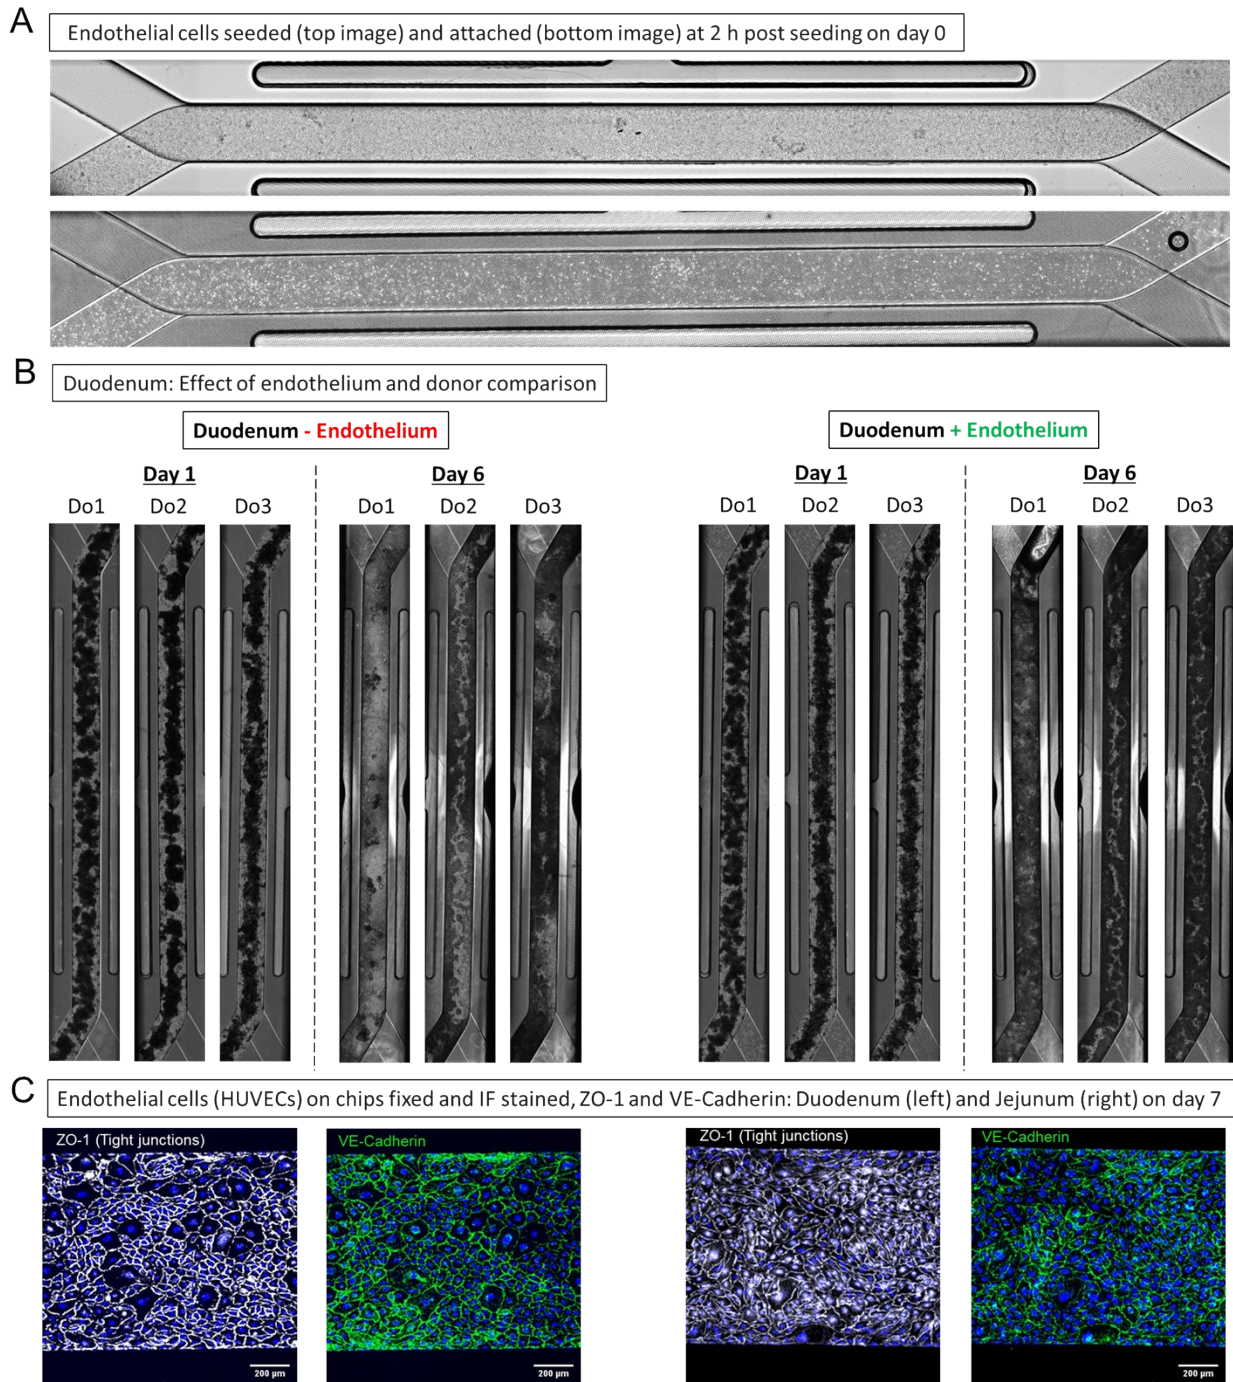

Figure S3.

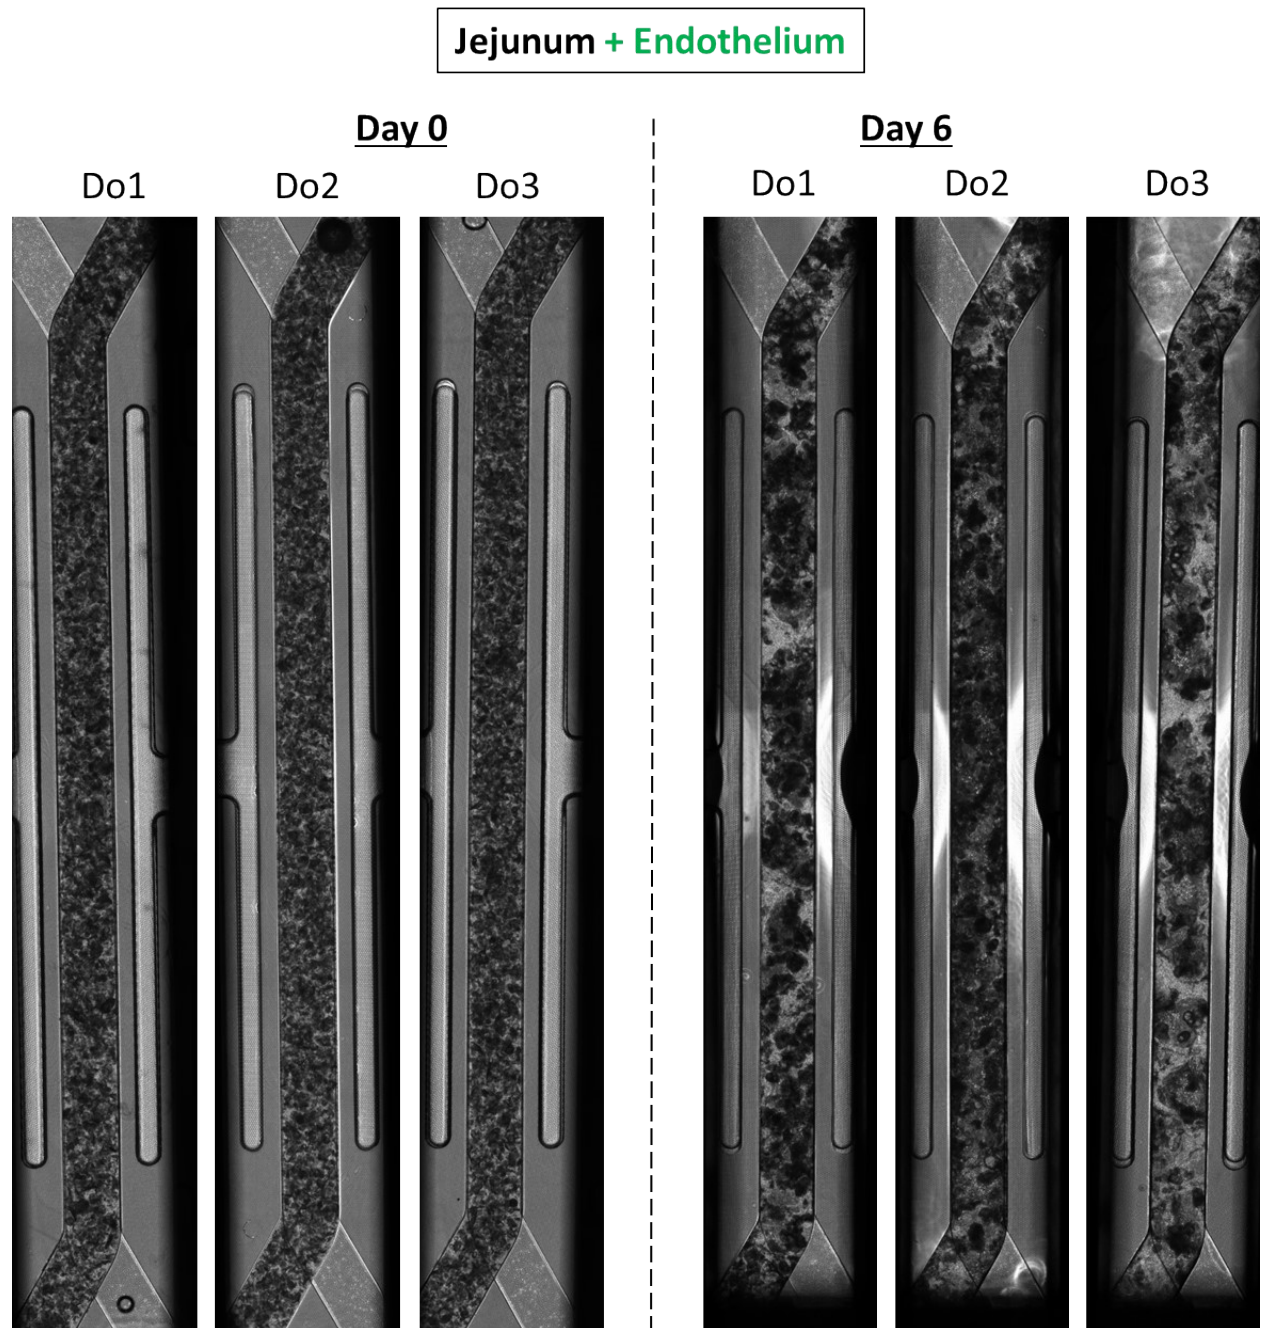

Figure S4.

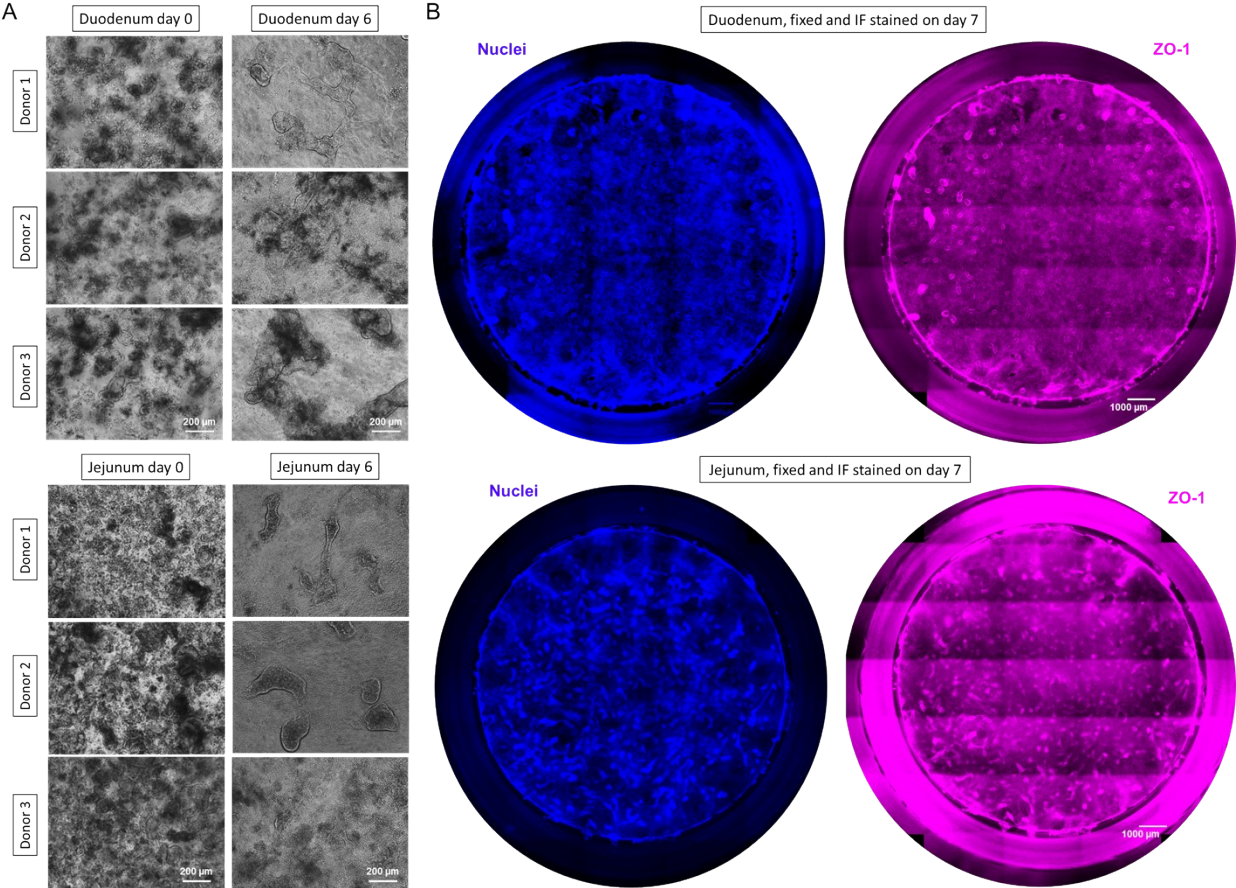

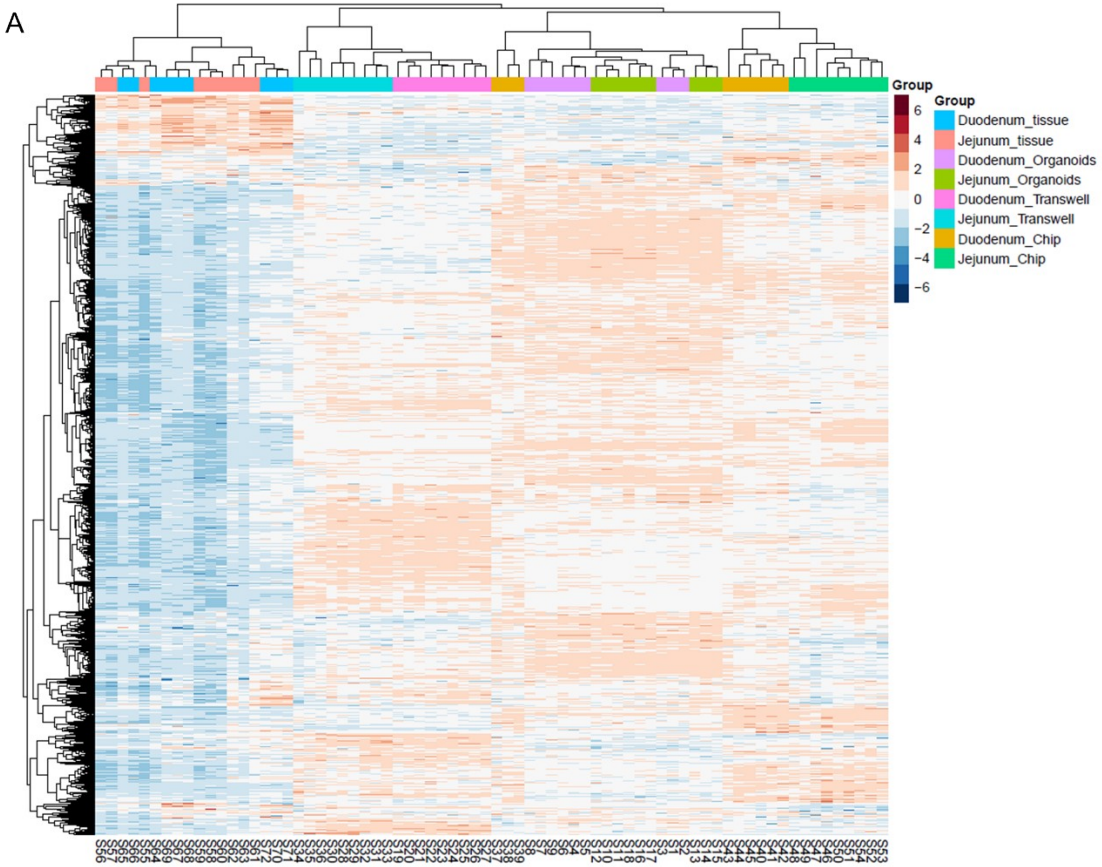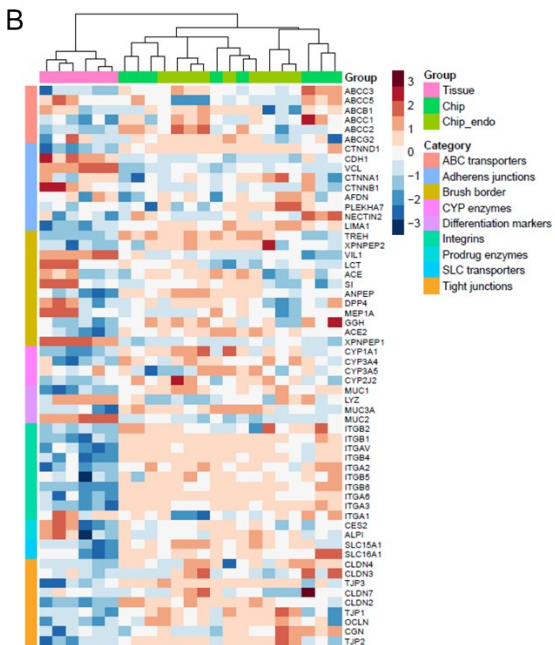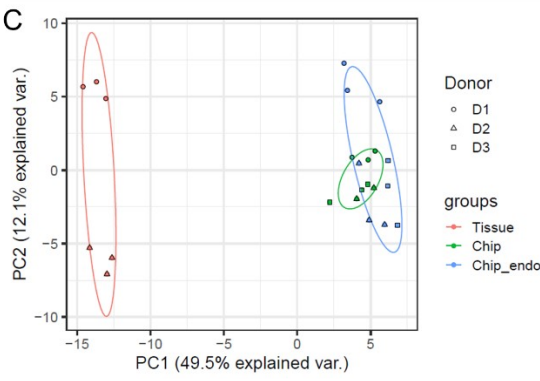

Figure S5.

Figure S6.

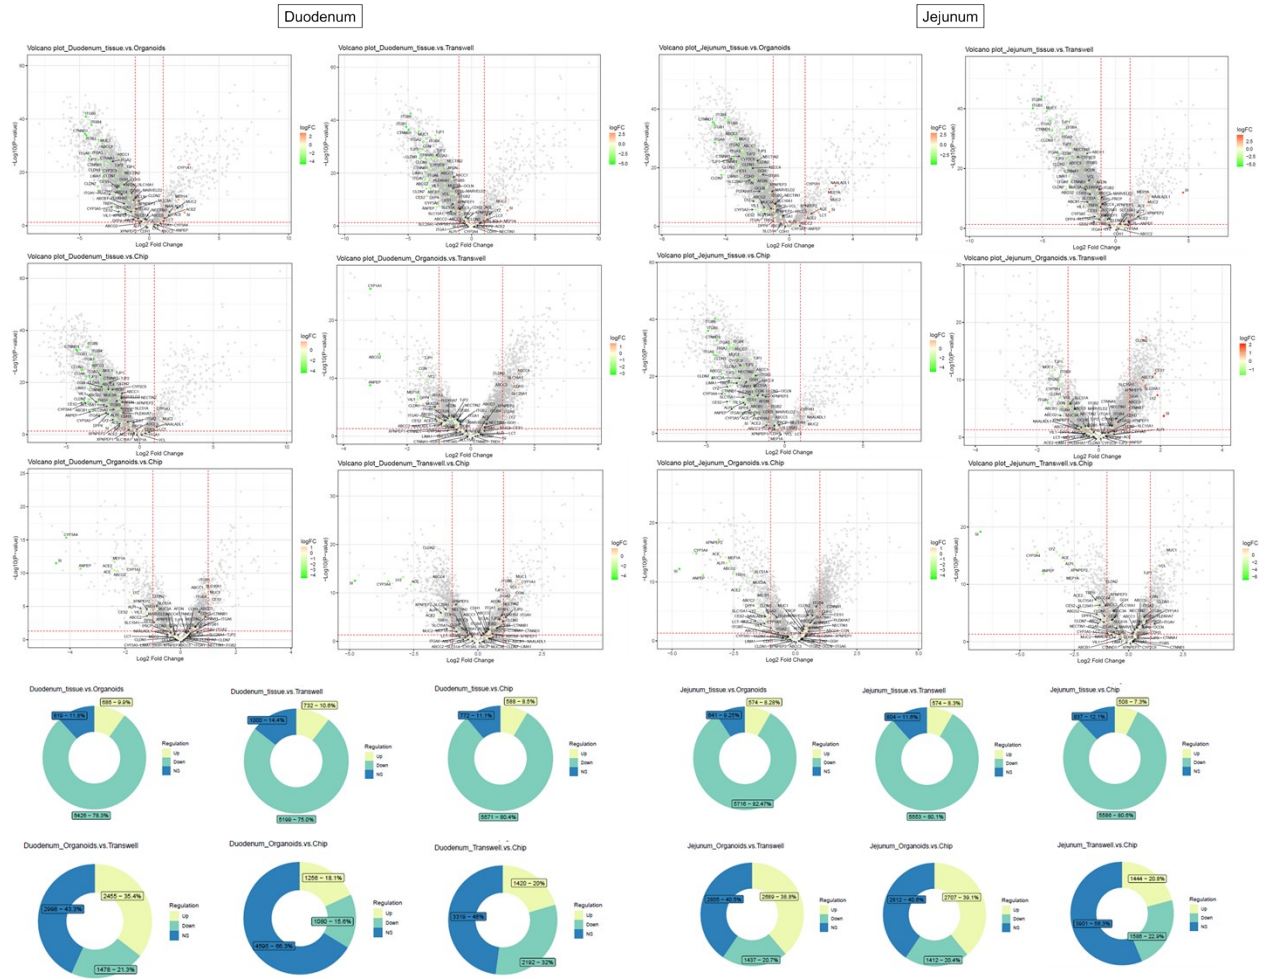

Figure S7.

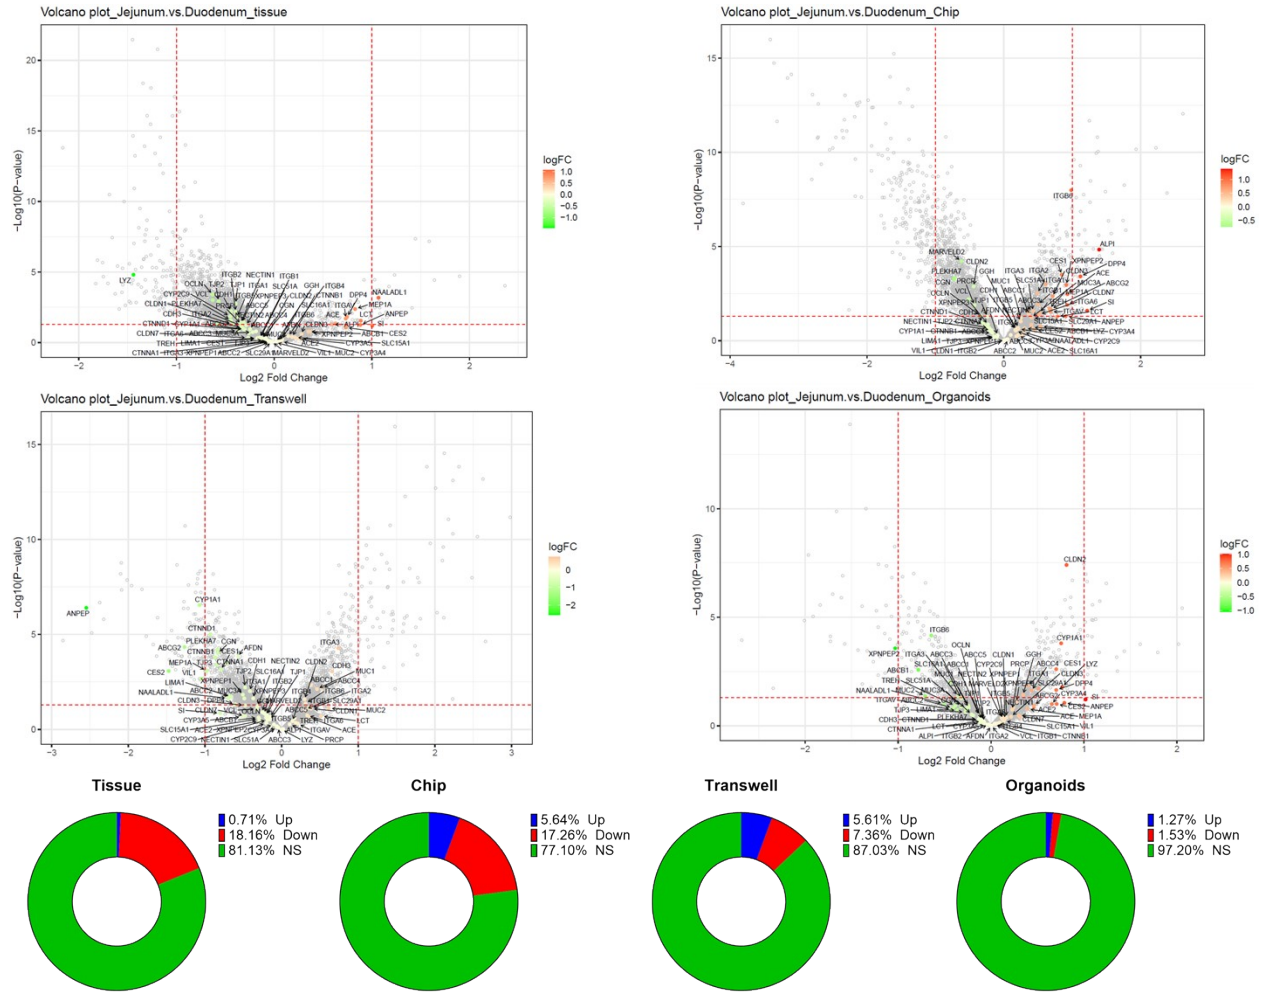

Figure S8.

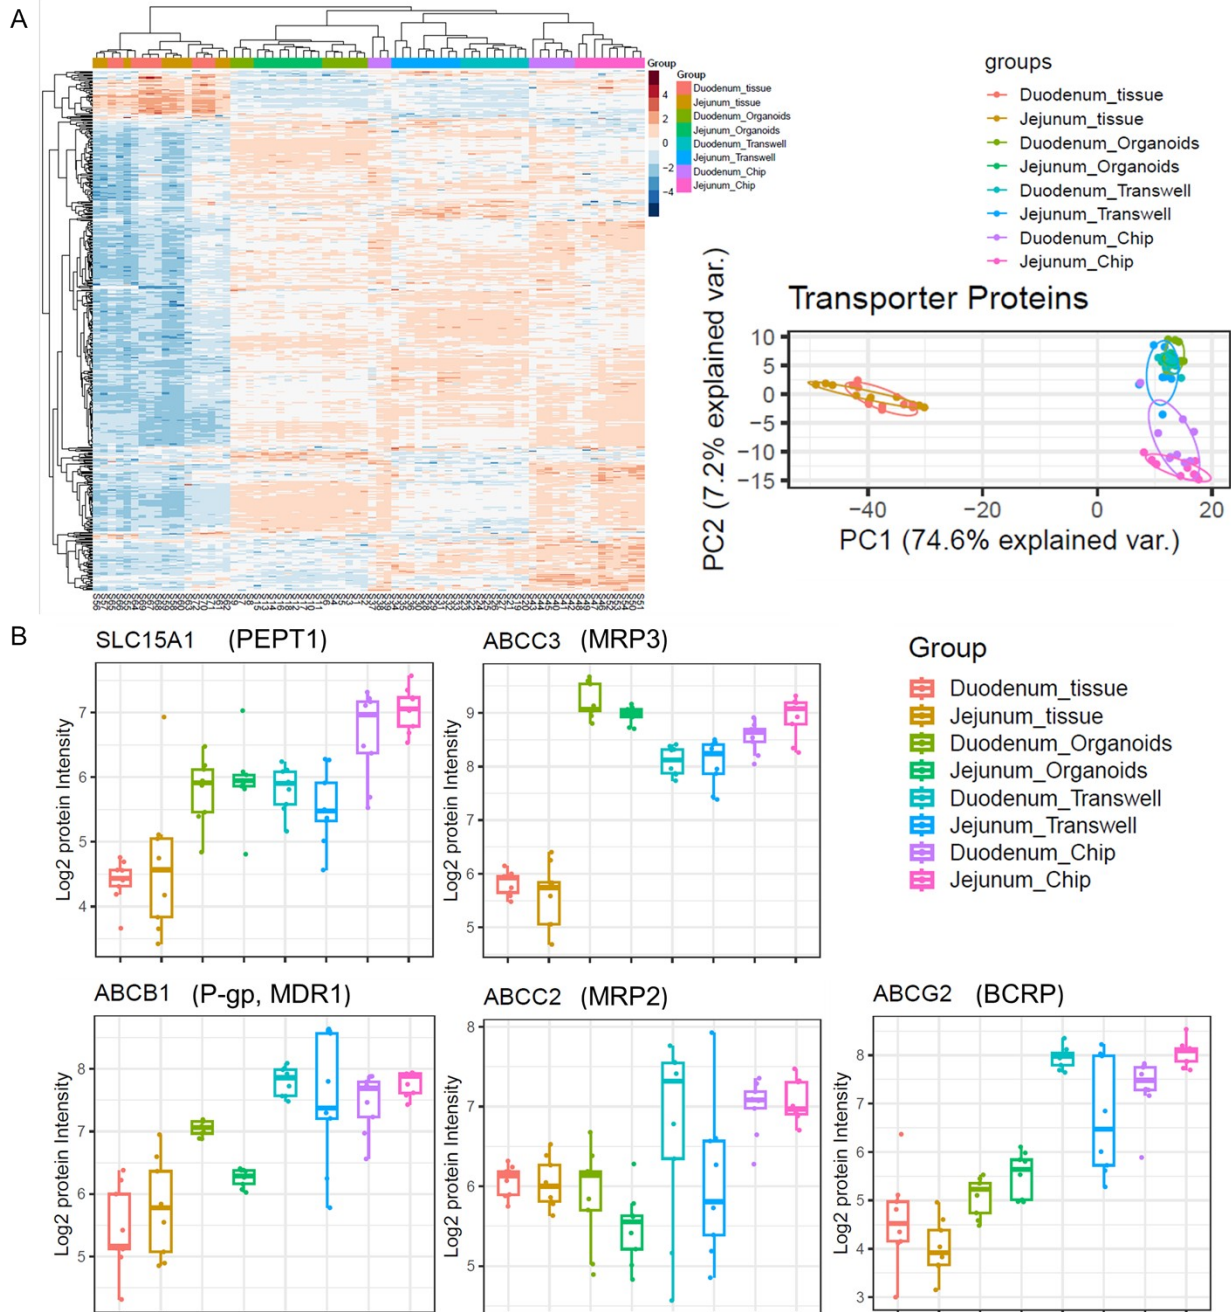



Figure S9.

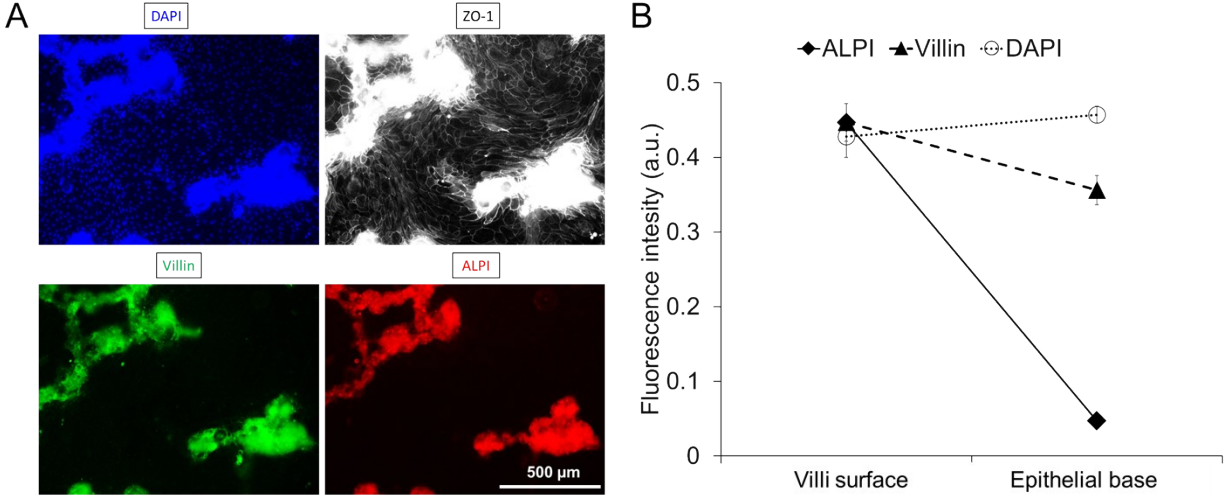

Figure S10.

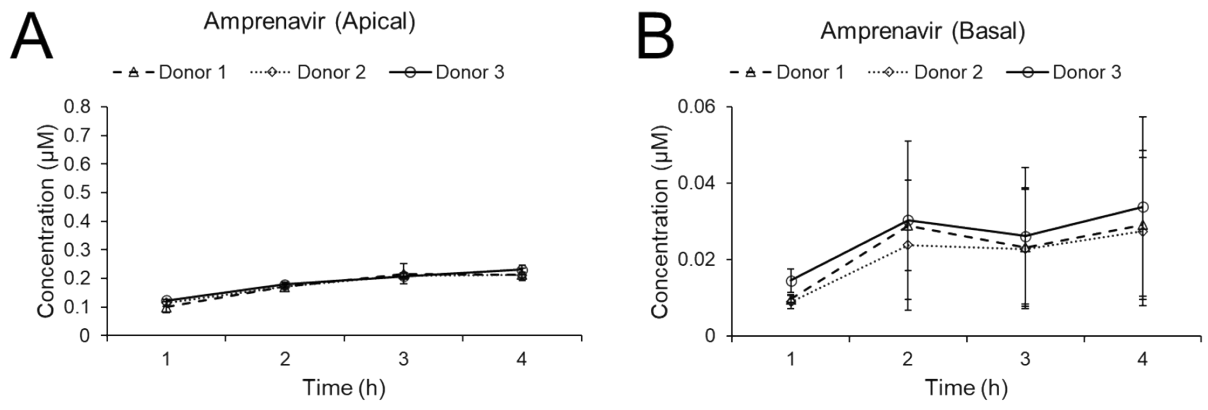

Figure S11.

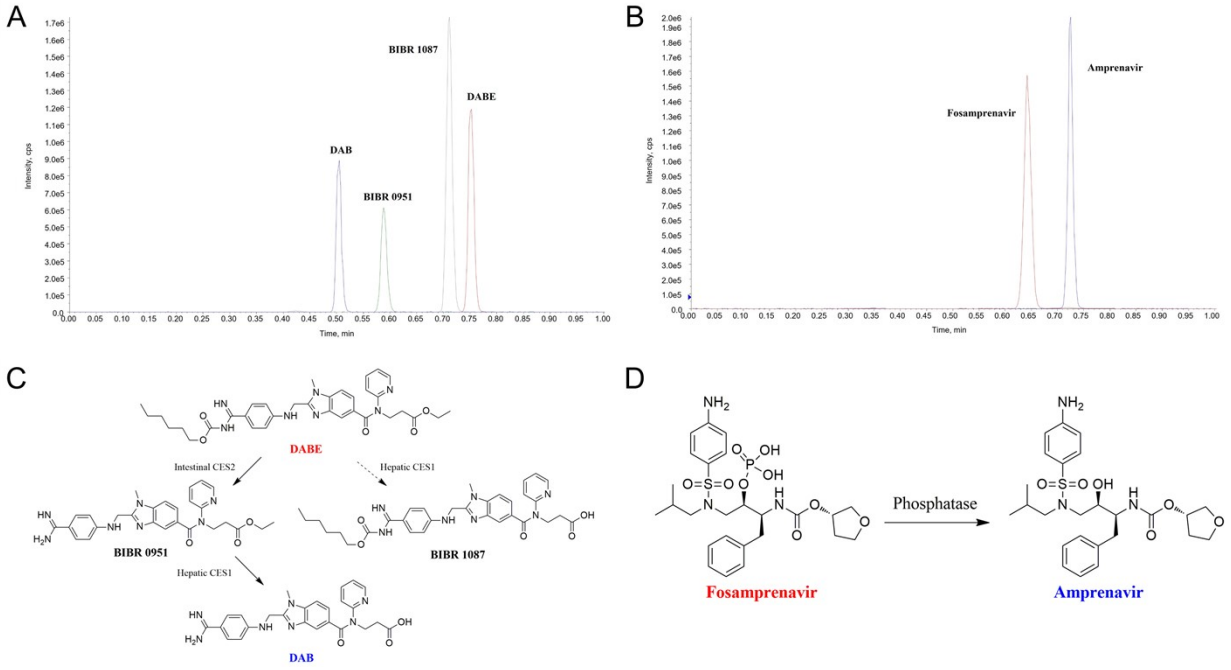

Figure S12.

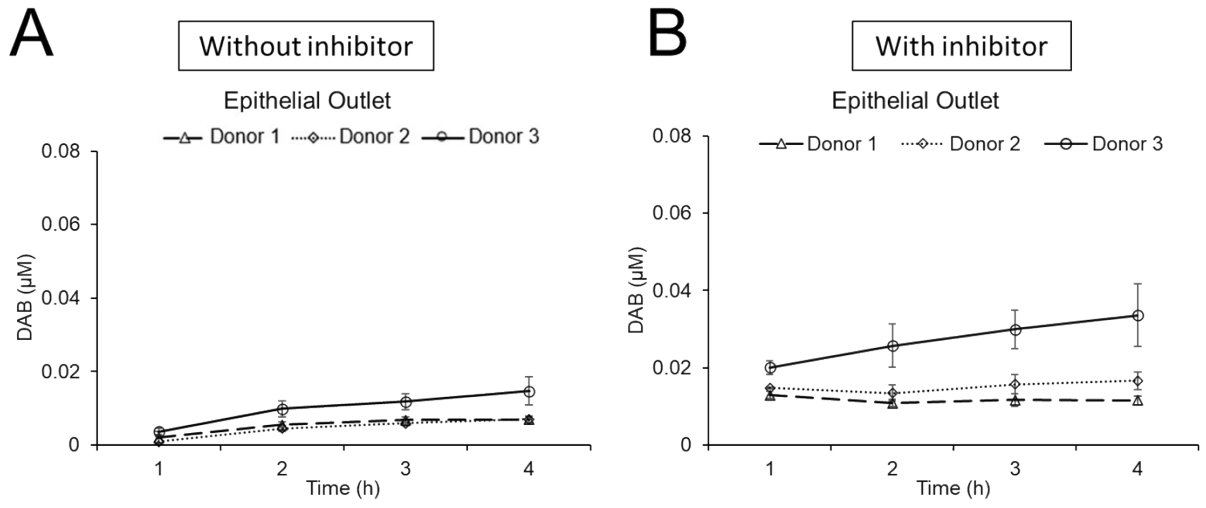

**Figure S1.** Tiled brightfield images of the ASC organoids embedded in Matrigel domes from duodenum and jejunum of three human donors.

**Figure S2.** (A) Tiled brightfield images of HUVECs as a single cell suspension (top) and attached after 2 hours (bottom) in the microfluidic chips. (B) Tiled brightfield images of duodenum organoid fractions from 3 donors in the epithelial channel of the microfluidic chips without (left) and with (right) endothelial cells in the bottom channel. (C) IF images showing junctional protein expression (ZO-1 and VE-cadherin) of the endothelial cells in duodenum (left) and jejunum (right) chips.

**Figure S3.** Tiled brightfield images of jejunum organoid fractions (Day 0) and formed an epithelial barrier (Day 6) from 3 donors (indicated as Do1, Do2 and Do3) in the apical channel of the microfluidic chips with endothelial cells in the bottom channel.

**Figure S4.** (A) Brightfield images of organoid fractions seeded in the apical side of the transwell inserts on day 0 (Duodenum on the top and Jejunum on the bottom; 3 donors) and epithelial layer with 3D morphological structures on day 6. (B) Representative tiled fluorescent images showing full coverage of the transwell membrane (nuclei, DAPI) and expressing junctional protein (ZO-1) on day 7 (Duodenum on the top and Jejunum on the bottom).

**Figure S5.** (A) Quantitative proteomic comparison of tissue, ASC organoids in matrix, transwells, and microfluidic chips for all detected proteins (global dataset) using heatmap and unsupervised hierarchical clustering. Values presented from 3 donors (duodenum and jejunum) and chip experiments repeated 3 times. Quantitative proteomic comparison of tissue, ASC organoids in microfluidic chips with, and without endothelial cells for all detected proteins using (A) heatmap and unsupervised hierarchical clustering and (B) principal component analysis (PCA) for a defined epithelial specific dataset. Values presented from 3 donors (duodenum only) and chip experiments repeated 3 times.

**Figure S6.** Up and down expression level of proteins and comparison for (Tissue, Organoids, Transwells and Microfluidic chips).

**Figure S7.** Sectional differences (Duodenum vs Jejunum) in protein expression for (Tissue, Organoids, Transwells and Microfluidic chips).

**Figure S8.** (A) Heatmap and unsupervised hierarchical clustering of all the detected transporters in duodenum and jejunum tissue vs in vitro models. Principal component analysis (PCA) of the selected proteins comparing the clusters from tissue and the in vitro cultures for duodenum and jejunum. (B) Bar graphs showing the comparison of expression across the samples for key drug transporters (Cytochrome P450; CYP3A4: intestinal alkaline phosphatase; ALPI: carboxylesterases 1 and 2; CES1 and CES2). Values represented as average ( $n = 3$  donors)  $\pm$  standard deviation, chip experiments repeated 3 times and data generated from all samples in a single **proteomics** workflow.

**Figure S9.** (A) Immunofluorescence confocal microscopy images showing the nuclei (DAPI, blue), expression of tight junction protein-1 (ZO-1, white), intestinal alkaline phosphatase (ALPI, red), and epithelial brush border membrane protein Villin (green) at the villi surface, epithelial base, and the endothelial base. (B) Quantification of the fluorescence signal intensity of the enzyme CES2 compared to DAPI at the villi surface and the epithelial base. Values represented as average of transwell (duodenum and

jejunum) experiments repeated 3 times (n = 1 donor)  $\pm$  standard deviation, and data generated by uniform normalization across all acquired images.

**Figure S10.** Prodrug enzyme kinetics for fosamprenavir to amprenavir bioconversion on static transwells.

**Figure S11.** Representative extracted ion chromatograms of target analytes: (A) the ester prodrug dabigatran etexilate (DABE) and its metabolites (BIBR 1087, BIBR 0951, and DAB); (B) the phosphate prodrug fosamprenavir and its active form amprenavir. Conversion of (C) ester prodrug DABE to DAB in the presence of intestinal and hepatic CES and (D) phosphate prodrug fosamprenavir to amprenavir in the presence of phosphatase.

**Figure S12.** Prodrug enzyme kinetics for DABE to DAB bioconversion on jejunum organoid chips (A) without BNPP and (B) with BNPP.

**Supplementary tables**

**Table S1.** Donor information for organoids and tissues

| <b>Organoids</b> |                  |                  |                  |                  |                  |                 |
|------------------|------------------|------------------|------------------|------------------|------------------|-----------------|
| <b>Duodenum</b>  |                  |                  | <b>Jejunum</b>   |                  |                  |                 |
| <b>Donor 1</b>   | <b>Donor 2</b>   | <b>Donor 3</b>   | <b>Donor 1</b>   | <b>Donor 2</b>   | <b>Donor 3</b>   |                 |
| M, 39            | M, 50            | F, 51            | M, 23            | M, 50            | F, 51            | <b>Donor ID</b> |
| Emulate          | Altis Biosystems | <b>Vendor</b>   |
| DP41N2           | HISC-DUO/5       | HISC-DUO/4       | HISC-JEJ/1       | HISC-JEJ/5       | HISC-JEJ/4       | <b>Cat #</b>    |
| <b>Tissue</b>    |                  |                  |                  |                  |                  |                 |
| <b>Duodenum</b>  |                  |                  | <b>Jejunum</b>   |                  |                  |                 |
| <b>Donor 1</b>   | <b>Donor 2</b>   | <b>Donor 3</b>   | <b>Donor 1</b>   | <b>Donor 2</b>   | <b>Donor 3</b>   |                 |
| M, 27            | M, 38            | M, 49            | M, 27            | M, 38            | M, 49            | <b>Donor ID</b> |
| BioIVT           | BioIVT           | BioIVT           | BioIVT           | BioIVT           | BioIVT           | <b>Vendor</b>   |
| S03006           | S03006           | S03006           | S03006           | S03006           | S03006           | <b>Cat #</b>    |
| MHU-I-022822     | MHU-I-111721     | MHU-I-120621     | MHU-I-022822     | MHU-I-111721     | MHU-I-120621     | <b>Lot#</b>     |

**Table S2.** Reagents and materials

| <b>Catalog No</b> | <b>Description</b>                                                       | <b>Supplier</b>                                |
|-------------------|--------------------------------------------------------------------------|------------------------------------------------|
| MSPP-06010        | MEDIUM INTESTICULT ORGANOID GROWTH MEDIUM KIT                            | Stemcell Technologies                          |
| CC-3162           | EGM-2 Endothelial Cell Growth Medium-2 BulletKit                         | LONZA                                          |
| MSPP-ANTPM1       | PRIMOCIN 500MG                                                           | INVIVOGEN                                      |
| 47743-722         | BD MATRIGEL MATRIX GROWTH FACTOR REDUCED PHENOL RED-FREE                 | CORNING                                        |
| C5533-5MG         | COLLAGEN IV FROM FROM HUMAN PLACENTA                                     | SIGMA ALDRICH                                  |
| 47743-654         | FIBRONECTIN HUMAN NATURAL 5MG                                            | CORNING                                        |
| ALX270333-MO05    | ROCK INHIBITOR Y27632, 5/MG                                              | ENZO                                           |
| SML1046-25MG      | CHIR99021 POWDER                                                         | SIGMA ALDRICH                                  |
| 47743-696         | SOLUTION CELL RECOVERY 100ML                                             | CORNING                                        |
| 12634010          | ADVANCED D-MEM/F-12                                                      | ThermoFisher Scientific                        |
| SE1M003M00        | FILTER UNIT MILLIPORE STERIFLIP-HV 0.45UM 50ML 25/CS                     | EMD Millipore                                  |
| 21-031-CV         | Dulbecco's PBS (DPBS -/-) (without Ca <sup>2+</sup> , Mg <sup>2+</sup> ) | CORNING                                        |
| ER-1              | 5 mg POWDER                                                              | EMULATE                                        |
| ER-2              | 25 mL BOTTLE                                                             | EMULATE                                        |
| TrypLE Express    | 1X, NO PHENOL RED                                                        | ThermoFisher Scientific                        |
| A9576             | BSA 30%, STERILE                                                         | SIGMA ALDRICH                                  |
| D2650             | DMSO STERILE                                                             | SIGMA ALDRICH                                  |
| MT25055CV         | Cell Culture Grade Water                                                 | CORNING                                        |
| C2519A            | HUVEC - Human Umbilical Vein Endothelial Cells, Pooled                   | LONZA                                          |
| C02-micro-10      | S-Trap™ micro columns (≤ 100 µg)                                         | PROTIFI                                        |
| V5280             | Promega Trypsin Gold, Mass Spectrometry Grade                            | PROMEGA                                        |
| 4465938           | Beta-Galactosidase Digest                                                | SCIEX                                          |
|                   | Acetonitrile, HPLC Grade                                                 | SIGMA ALDRICH                                  |
|                   | Methanol, HPLC Grade                                                     | SIGMA ALDRICH                                  |
|                   | Milli-Q water, ultra pure                                                | Purified by Millipore Milli-Q lab water system |
|                   | Trifluoroacetic acid, 99%                                                | ThermoFisher Scientific                        |
|                   | Formic acid                                                              | ThermoFisher Scientific                        |



**Table S3.** Equipment and instrumentation

| <b>Equipment</b>                          | <b>Vendor</b>                       |
|-------------------------------------------|-------------------------------------|
| Zoë CM-1® Culture Module                  | EMULATE                             |
| Orb-HM1® Hub Module                       | EMULATE                             |
| Chip-S1™                                  | EMULATE                             |
| Pod™ Portable Modules                     | EMULATE                             |
| UV Light Box                              | EMULATE                             |
| Chip Cradle                               | EMULATE                             |
| ECM coated transwells                     | ALTIS Biosystems                    |
| TEER measurement device                   | EVOM3 - World Precision Instruments |
| FV1000 MPE microscope                     | Olympus                             |
| EVOS M7000                                | ThermoFisher Scientific             |
| Dionex Ultimate 3000 HPLC                 | ThermoFisher                        |
| Triple TOF 6600 mass spectrometer         | Sciex                               |
| Bioruptor® Pico sonication device         | Bioruptor                           |
| 5500 Triple quadrupole mass spectrometer  | SCIEX                               |
| 6500+ Triple quadrupole mass spectrometer | SCIEX                               |
| Agilent 1290 UPLC                         | Agilent                             |
| CTC PAL Autosampler                       | CTC Analytics AG                    |

**Table S4.** Antibodies and IF reagents

| <b>Cat#</b>     | <b>Antibody</b>                                                                           | <b>Vendor</b>           |
|-----------------|-------------------------------------------------------------------------------------------|-------------------------|
| MA339100A647    | ZO-1, ALEXA FLUOR 647                                                                     | ThermoFisher Scientific |
| NB100-2638AF594 | Alkaline Phosphatase, Intestinal Antibody (AAP1) [Alexa Fluor 594]                        | NOVUS BIOLOGICALS       |
| NBP3-08929AF488 | Villin 1 Antibody (VIL1/2310R) [Alexa Fluor 488]                                          | NOVUS BIOLOGICALS       |
| PA582645        | CES2 Polyclonal Antibody                                                                  | ThermoFisher Scientific |
| NBP2-48854-25UL | CES1 ANTIBODY                                                                             | NOVUS BIOLOGICALS       |
| PA514896        | ANTI-CYP3A4                                                                               |                         |
| 53-1449-42      | CD144 (VE-cadherin) Monoclonal Antibody (16B1), Alexa Fluor 488                           | ThermoFisher Scientific |
| A32731          | GOAT ANTI-RABBIT IGG (H+L) HIGHLY CROSS-ADSORBED SECONDARY ANTIBODY, ALEXA FLUOR PLUS 488 | ThermoFisher Scientific |
| 5087410001-MIL  | DAPI                                                                                      | EMD Millipore           |
| A30106          | AF+ 555-PHALLOIDIN                                                                        | ThermoFisher Scientific |
| D7132           | DEXTRAN, CASCADE BLUE                                                                     | ThermoFisher Scientific |
| J19943-K2       | PARAFORMALDEHYDE SOLUTION, 4% IN PBS, 1L, AFFYMETRIX                                      | ThermoFisher Scientific |
| J63209AK        | SAPONIN PERMEATING SOLUTION                                                               | ThermoFisher Scientific |
